# Supplementary material for: Characterization of the Physical, Chemical, and Adsorption Properties of Coal-Fly-Ash–Hydroxyapatite Composites
Source: MDPI journal article supplement (doi:10.3390/min11070774), 2021-07-16
Supplement: s1 [file s1]

Supplementary Materials

# Characterization of the Physical, Chemical, and Adsorption Properties of Coal-Fly-Ash–Hydroxyapatite Composites

Eleonora Sočo <sup>1,\*</sup>, Dorota Papciak <sup>2</sup>, Magdalena M. Michel <sup>3,\*</sup>, Dariusz Pająk <sup>4</sup>, Andżelika Domoń <sup>2</sup> and Bogdan Kupiec <sup>4</sup>

<sup>1</sup> Department of Inorganic and Analytical Chemistry, Faculty of Chemistry, Rzeszów University of Technology, 35-959 Rzeszów, Poland

<sup>2</sup> Department of Water Purification and Protection, Faculty of Civil, Environmental Engineering and Architecture, Rzeszów University of Technology, 35-959 Rzeszów, Poland; dpapciak@prz.edu.pl (D.P.); adomon@prz.edu.pl (A.D.)

<sup>3</sup> Institute of Environmental Engineering, Warsaw University of Life Sciences-SGGW, 02-787 Warsaw, Poland

<sup>4</sup> Department of Casting and Welding, Faculty of Mechanical Engineering and Aeronautics, Rzeszów University of Technology, 35-959 Rzeszów, Poland; pajak@prz.edu.pl (D.P.); kupiec@prz.edu.pl (B.K.)

\* Correspondence: eleonora@prz.edu.pl (E.S.); magdalena\_michel@sggw.edu.pl (M.M.M.)

## Supplementary Materials

**Table S1.** Types of vibrations, bands, and intensities for the FT-IR spectra of CFA–HAp2 before adsorption (black), CFA–HAp2 after Cu(II) adsorption (red), and CFA–HAp2 Cu(II) desorption (blue).

| No. on Figure 7                         | Region [cm <sup>−1</sup> ] | Band                                     | Intensity |
|-----------------------------------------|----------------------------|------------------------------------------|-----------|
| <b>CFA–HAp2</b>                         |                            |                                          |           |
| 1                                       | 3405                       | OH <sub>st</sub> stretching              | medium    |
| 2                                       | 1641                       | NH <sub>de</sub> deformation vibrations  | strong    |
| 3                                       | 1564                       | NH <sub>de</sub> deformation vibrations  | medium    |
| 4                                       | 1395                       | NH <sub>3</sub> asymmetric               | medium    |
| 5                                       | 1302                       | PO <sub>st</sub> stretching              | medium    |
| 6                                       | 1030                       | P–O <sub>st</sub> stretching             | strong    |
| 7                                       | 563                        | O–P–O bending vibrations                 | strong    |
| <b>CFA–HAp2 After Cu(II) Adsorption</b> |                            |                                          |           |
| 8                                       | 3428                       | OH <sub>st</sub> stretching              | medium    |
| 9                                       | 2925                       | OH <sub>st</sub> stretching              | weak      |
| 10                                      | 1634                       | NH <sub>de</sub> deformation vibrations  | medium    |
| 11                                      | 1548                       | NH <sub>de</sub> deformation vibrations  | medium    |
| 12                                      | 1458                       | CO <sub>3</sub> <sup>2−</sup> stretching | weak      |
| 13                                      | 1383                       | NH <sub>3</sub> asymmetric               | weak      |
| 14                                      | 1031                       | PO <sub>st</sub> stretching              | strong    |
| 15                                      | 962                        | P–O <sub>st</sub> stretching             | weak      |
| 16                                      | 565                        | O–P–O bending vibrations                 | strong    |
| <b>CFA–HAp2 After Cu(II) Desorption</b> |                            |                                          |           |
| 17                                      | 3425                       | OH <sub>st</sub> stretching              | medium    |
| 18                                      | 1633                       | NH <sub>de</sub> deformation vibrations  | medium    |
| 19                                      | 1548                       | NH <sub>de</sub> deformation vibrations  | medium    |
| 20                                      | 1458                       | CO <sub>3</sub> <sup>2−</sup> stretching | weak      |
| 21                                      | 1384                       | NH <sub>3</sub> asymmetric               | weak      |
| 22                                      | 1033                       | P–O <sub>st</sub> stretching             | strong    |
| 23                                      | 565                        | O–P–O bending vibrations                 | strong    |

**Table S2.** Types of vibrations, bands, and intensities for the FT-IR spectra of CFA–HAp2 before adsorption (black) and CFA–HAp2 after the adsorption of RB (red) and for RB dye alone (blue).

| No. on Figure 8                     | Region [cm <sup>-1</sup> ] | Band                                    | Intensity     |
|-------------------------------------|----------------------------|-----------------------------------------|---------------|
| <b>CFA–HAp2</b>                     |                            |                                         |               |
| <b>1</b>                            | 3405                       | OH <sub>stretching</sub>                | medium        |
| <b>2</b>                            | 1641                       | NH <sub>deformation vibrations</sub>    | strong        |
| <b>3</b>                            | 1564                       | NH <sub>deformation vibrations</sub>    | medium        |
| <b>4</b>                            | 1395                       | NH <sub>3 asymmetric</sub>              | medium        |
| <b>5</b>                            | 1302                       | PO <sub>stretching</sub>                | medium        |
| <b>6</b>                            | 1030                       | P–O <sub>stretching</sub>               | strong        |
| <b>7</b>                            | 563                        | O–P–O <sub>bending vibrations</sub>     | strong        |
| <b>CFA–HAp2 After RB Adsorption</b> |                            |                                         |               |
| <b>8</b>                            | 3417                       | OH <sub>stretching</sub>                | medium        |
| <b>9</b>                            | 2924                       | C–H <sub>stretching</sub>               | strong        |
| <b>10</b>                           | 1640                       | NH <sub>deformation vibrations</sub>    | strong        |
| <b>11</b>                           | 1538                       | NH <sub>deformation vibrations</sub>    | medium        |
| <b>12</b>                           | 1450                       | CH <sub>3 asymmetric</sub>              | medium        |
| <b>13</b>                           | 1301                       | C–O <sub>stretching</sub>               | medium        |
| <b>14</b>                           | 1032                       | P–O <sub>stretching</sub>               | strong        |
| <b>15</b>                           | 779                        | C–Cl <sub>stretching</sub>              | strong        |
| <b>16</b>                           | 563                        | O–P–O <sub>bending vibrations</sub>     | strong        |
| <b>Rhodamine B</b>                  |                            |                                         |               |
| <b>17</b>                           | 3383                       | NH <sub>stretching</sub>                | strong/medium |
| <b>18</b>                           | 2975                       | C–H <sub>stretching</sub>               | weak          |
| <b>19</b>                           | 1588                       | NH <sub>deformation vibrations</sub>    | medium        |
| <b>20</b>                           | 1412                       | C–N <sub>deformation vibrations</sub>   | medium        |
| <b>21</b>                           | 1076                       | C–O–C <sub>stretching, asymmetric</sub> | strong        |
| <b>22</b>                           | 682                        | C–Cl <sub>stretching</sub>              | strong        |
